# Supplementary material for: Molecular Cloning, Sequence Characterization and Expression Analysis of a CD63 Homologue from the Coleopteran Beetle, Tenebrio molitor
Source: MDPI journal article supplement (doi:10.3390/ijms141020744), 2013-10-15
Supplement: s1 [file s1]

## Supplementary Information

**Figure S1.** Transmembrane domain prediction of TmCD63. The protein belongs to TM<sub>4</sub>SF, as four transmembrane domains have been noted, the long strings showing the LEL motif of the tetraspanin.

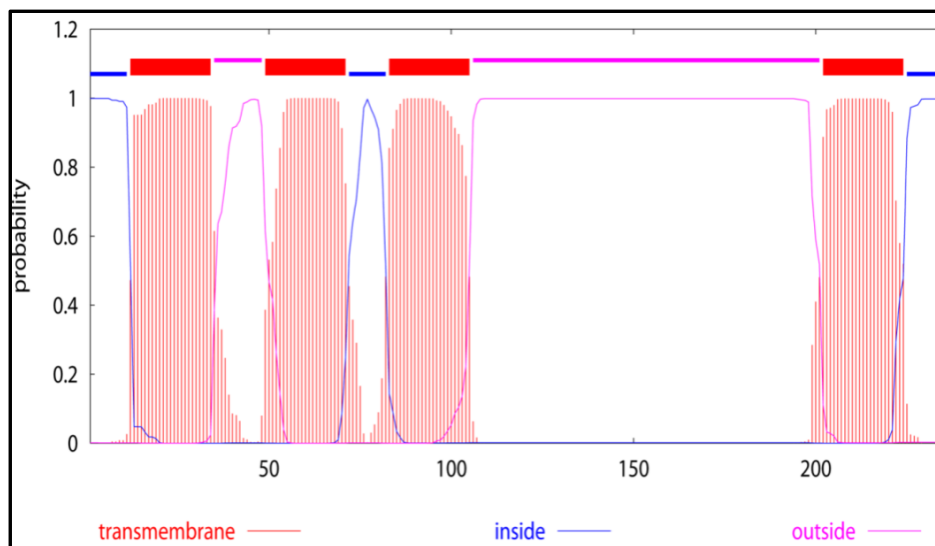

**Figure S2.** Kyte-Doolittle hydropathy plot of TmCD63. The hydropathic character of the protein was predicted using ProtScale at ExPASy bioinformatics resource portal. The four transmembrane domains of continuously high hydrophobicity are numbered, as are the short and long extracellular domains 1 and 2.

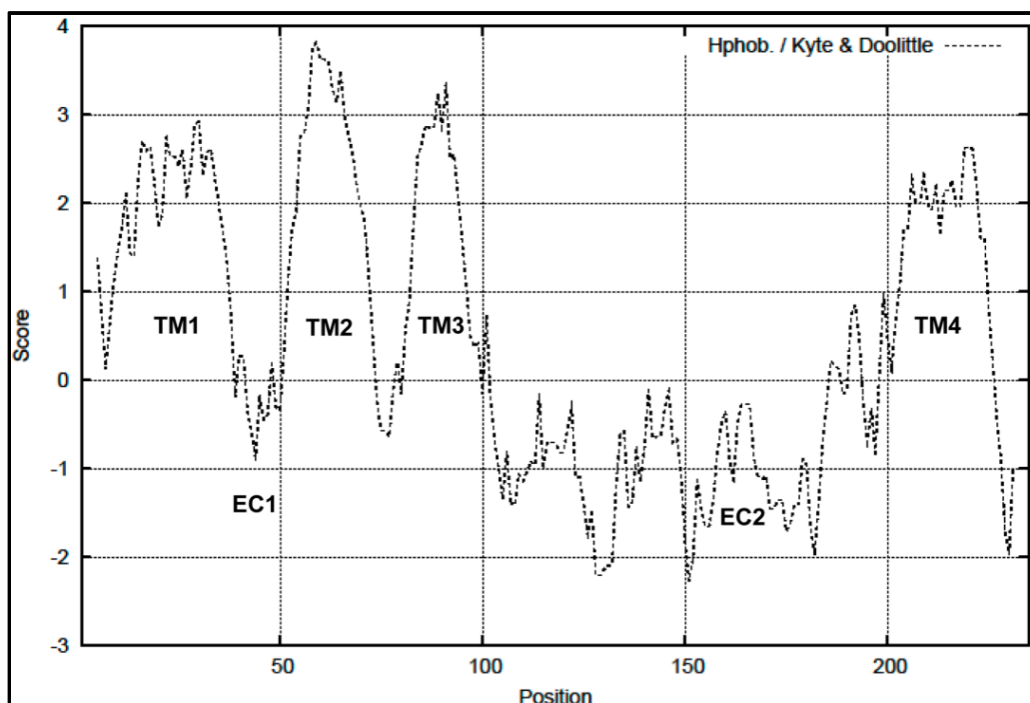

**Table S1.** Primers used in the present study.

| Primers                              | Sequence (5'-3')                              |
|--------------------------------------|-----------------------------------------------|
| <b>RACE-PCR primers</b>              |                                               |
| 3'-GSP1 (forward)                    | CTCTACCTCACACTTGCTGT                          |
| 3'-nGSP2 (forward)                   | TTGGCATCGCGATTTGTCAGC                         |
| 3'-CDS Primer A<br>(OligodT adaptor) | AAGCAGTGGTATCAACGCAGAGTA(T) <sub>30</sub> VN  |
| SMARTer IIA oligonucleotide          | AAGCAGTGGTATCAACGCAGAGTACXXXXX                |
| Universal adaptor primer             | CTAATACGACTCACTATAGGGCAAGCAGTGGTATCAACGCAGAGT |
| <b>Sequencing primers</b>            |                                               |
| M13-F (forward)                      | GTAAAACGACGGCCAG                              |
| M13-R (reverse)                      | CAGGAAACAGCTATGAC                             |
| <b>Real-time PCR primers</b>         |                                               |
| TmCD63 (forward)                     | TTGCTGTCCAGACACACCTG                          |
| TmCD63 (reverse)                     | CAGCTGACAAATCGCGATCG                          |
| L27A (forward)                       | TCATCCTGAAGGCAAAGCTCAGT                       |
| L27A (reverse)                       | AGGTTGGTTAGGCAGGCACCTTT                       |

© 2013 by the authors; licensee MDPI, Basel, Switzerland. This article is an open access article distributed under the terms and conditions of the Creative Commons Attribution license (<http://creativecommons.org/licenses/by/3.0/>).
